# Supplementary material for: Multiple F-Box Proteins Collectively Regulate Cell Development and Pathogenesis in the Human Pathogen Cryptococcus neoformans
Source: MDPI journal article supplement (doi:10.3390/jof8121259), 2022-11-29
Supplement: s1 [file s1]

Table S1 Strains and plasmids used in this study

| Strains   | Genotype                              | Source/reference |
|-----------|---------------------------------------|------------------|
| H99       | MATalpha                              | [1]              |
| KN99alpha | MATalpha                              | [2]              |
| KN99a     | MATa                                  | [2]              |
| CUX2      | MATalpha <i>fbp1::NEO</i>             | [3]              |
| CUX3      | MATa <i>fbp1::NEO</i>                 | [3]              |
| CUX403    | MATalpha <i>fbp3::NAT</i>             | [4]              |
| CUX404    | MATalpha <i>fbp11::NAT</i>            | [4]              |
| CUX405    | MATalpha <i>fbp20::NAT</i>            | [4]              |
| CUX407    | MATalpha <i>fbp5::NAT</i>             | [4]              |
| CUX776    | MATalpha <i>fbp8::NAT</i>             | [4]              |
| CUX777    | MATalpha <i>fbp10::NAT</i>            | [4]              |
| CUX778    | MATalpha <i>fbp9::NAT</i>             | [4]              |
| CUX780    | MATalpha <i>fbp4::NAT</i>             | [4]              |
| CUX781    | MATalpha <i>fbp15::NAT</i>            | [4]              |
| CUX782    | MATalpha <i>fbp16::NAT</i>            | [4]              |
| CUX783    | MATalpha <i>fbp18NAT</i>              | [4]              |
| CUX1281   | MATalpha <i>fbp17::NAT</i>            | [4]              |
| CUX1282   | MATalpha <i>fbp2::NAT</i>             | [4]              |
| CUX1228   | MATa <i>fbp5::NAT</i>                 | This study       |
| CUX1229   | MATa <i>fbp8::NAT</i>                 | This study       |
| CUX1230   | MATa <i>fbp10::NAT</i>                | This study       |
| CUX1231   | MATa <i>fbp9::NAT</i>                 | This study       |
| CUX1232   | MATa <i>fbp4::NAT</i>                 | This study       |
| CUX1233   | MATa <i>fbp16::NAT</i>                | This study       |
| CUX1234   | MATa <i>fbp18::NAT</i>                | This study       |
| CUX1276   | MATa <i>fbp3::NAT</i>                 | This study       |
| CUX1277   | MATa <i>fbp11::NAT</i>                | This study       |
| CUX1278   | MATa <i>fbp20::NAT</i>                | This study       |
| CUX1279   | MATa <i>fbp15::NAT</i>                | This study       |
| CUX1283   | MATalpha <i>fbp19::NAT</i>            | This study       |
| CUX1284   | MATalpha <i>fbp7::NAT</i>             | This study       |
| CUX1285   | MATalpha <i>fbp12::NAT</i>            | This study       |
| CUX1286   | MATalpha <i>fbp6::NAT</i>             | This study       |
| CUX1287   | MATalpha <i>fbp13::NAT</i>            | This study       |
| CUX1297   | MATa <i>fbp2::NAT</i>                 | This study       |
| CUX1298   | MATa <i>fbp6::NAT</i>                 | This study       |
| CUX1299   | MATa <i>fbp7::NAT</i>                 | This study       |
| CUX1300   | MATa <i>fbp12::NAT</i>                | This study       |
| CUX1301   | MATa <i>fbp13::NAT</i>                | This study       |
| CUX1302   | MATa <i>fbp17NAT</i>                  | This study       |
| CUX1303   | MATa <i>fbp19NAT</i>                  | This study       |
| CUX1319   | MATa <i>fbp4::NAT fbp11::NAT</i>      | This study       |
| CUX1320   | MATalpha <i>fbp4::NAT fbp11::NAT</i>  | This study       |
| CUX1322   | MATalpha <i>fbp11::NAT FBPI1::NEO</i> | This study       |
| CUX1323   | MATalpha <i>fbp4::NAT FBP4::NEO</i>   | This study       |
| CUX1324   | MATalpha <i>fbp8::NAT FBP8::NEO</i>   | This study       |

## Reference

- 1 Perfect, J. R., Schell, W. A. & Rinaldi, M. G. Uncommon invasive fungal pathogens in the acquired immunodeficiency syndrome. *J Med Vet Mycol* **31**, 175-179 (1993).
- 2 Nielsen, K. *et al.* Sexual cycle of *Cryptococcus neoformans* var. *grubii* and virulence of congenic  $\alpha$  and  $\alpha$  isolates. *Infect Immun* **71**, 4831-4841, doi:10.1128/iai.71.9.4831-4841.2003 (2003).
- 3 Liu, T. B. *et al.* The F-Box protein Fbp1 regulates sexual reproduction and virulence in *Cryptococcus neoformans*. *Eukaryot Cell* **10**, 791-802, doi:10.1128/EC.00004-11 (2011).
- 4 Chun, C. D. & Madhani, H. D. Applying genetics and molecular biology to the study of the human pathogen *Cryptococcus neoformans*. *Methods Enzymol* **470**, 797-831, doi:10.1016/S0076-6879(10)70033-1 (2010).
