# Supplementary material for: Multiple F-Box Proteins Collectively Regulate Cell Development and Pathogenesis in the Human Pathogen Cryptococcus neoformans
Source: MDPI journal article supplement (doi:10.3390/jof8121259), 2022-11-29
Supplement: s1 [file s1]

**Table S2.** Primers used in this study.

| Primers | Sequences (5'-3')                      | Description           |
|---------|----------------------------------------|-----------------------|
| CX449   | AACACCAGCACCAACACCAACA                 | <i>FBP11</i> F3       |
| CX450a  | TTGGCCTTGGCCTTTGTCTTGA                 | <i>FBP11</i> R3       |
| CX1346  | TTCTGATAACTCGCGAATCG                   | <i>FBP19</i> F1       |
| CX1347  | ctggccgctggtttacAGATGAAGTTGCCATTGTCC   | <i>FBP19</i> R1       |
| CX1348  | gtcatagctgtttcctgTCATCTTCCGAGCGTAATG   | <i>FBP19</i> F2       |
| CX1349  | AGGGACATCTCGATGGATC                    | <i>FBP19</i> R2       |
| CX1350  | TCTCAGCAGATTCACCAGC                    | <i>FBP19</i> F3       |
| CX1351  | AGTGTAAGCTTGCGATATCC                   | <i>FBP19</i> R3       |
| CX1352  | ACAAGTGCACAGTCTTCTCC                   | <i>FBP19</i> F4       |
| CX1353  | ACAATGCCAAGATGACGAC                    | <i>FBP7</i> F1        |
| CX1354  | ctggccgctggtttacAGGAGGAGTTATCTGGCAAG   | <i>FBP7</i> R1        |
| CX1355  | gtcatagctgtttcctgACGAATTGTCACCAGAATG   | <i>FBP7</i> F2        |
| CX1356  | ATCTCTTGTGCAGCCAACTC                   | <i>FBP7</i> R2        |
| CX1357  | TGGATCAATAGCTCAAGAACC                  | <i>FBP7</i> F3        |
| CX1358  | CACTGAAAGCATCTCCACAC                   | <i>FBP7</i> R3        |
| CX1359  | TGAATAACATCGTCCACGTC                   | <i>FBP7</i> F4        |
| CX1360  | ACTTTACTTCCCTCCTGCAG                   | <i>FBP12</i> F1/F3    |
| CX1361  | ctggccgctggtttacACATACCTCCACCAGTCACC   | <i>FBP12/FBP13</i> R1 |
| CX1362  | gtcatagctgtttcctgTGCAGACTAACGTTGAATGG  | <i>FBP12</i> F2       |
| CX1363  | TCACATGCACCGTTTAGAAG                   | <i>FBP12</i> R2       |
| CX1365  | TCACAAACTTCGTCCCTGC                    | <i>FBP12</i> R4       |
| CX1366  | TGGTTTCAACTACGATCACC                   | <i>FBP12</i> F4       |
| CX1367  | ACTACGAGGAAAGAGTGGGTC                  | <i>FBP13</i> F1/F3    |
| CX1368  | TGTCAGGTTGGTCAAATTAGC                  | <i>FBP13</i> R4       |
| CX1369  | gtcatagctgtttcctgTCGAGTGACTTGTTTTGTGC  | <i>FBP13</i> F2       |
| CX1370  | AATCCGCTAAACCGTGTATC                   | <i>FBP13</i> R2       |
| CX1371  | ATGGATGTGGAATGATTGTC                   | <i>FBP13/FBP12</i> R3 |
| CX1373  | TCCAAGCGAAGAGATACAATG                  | <i>FBP13</i> F4       |
| CX1374  | TGCCCGTGGTTATAAGACAG                   | <i>FBP14</i> F1       |
| CX1375  | ctggccgctggtttacAGAAGGAGACATGGTGGGAG   | <i>FBP13</i> R1       |
| CX1376  | gtcatagctgtttcctgTTGATATCACTCCATCCACG  | <i>FBP13</i> F2       |
| CX1377  | AACTCGTCCTTTTCCTGTCC                   | <i>FBP13</i> R2       |
| CX1378  | ACAGTGAGCTCGATTGGTG                    | <i>FBP13</i> F3       |
| CX1379  | TCCATAACCCTCAAACACTC                   | <i>FBP13</i> R3       |
| CX1380  | AGGAACGTGTGTCATCTAGTC                  | <i>FBP13</i> F4       |
| CX1381  | TCCATGGCAGTAGTGATCC                    | <i>FBP6</i> F1        |
| CX1382  | ctggccgctggtttacTCTGAACTGGAAGACAAAATG  | <i>FBP6</i> R1        |
| CX1383  | gtcatagctgtttcctgTCGTCTGAGTGCATATTCTGG | <i>FBP6</i> F2        |
| CX1384  | TCACCTGATGAGCCTTGAG                    | <i>FBP6</i> R2        |

---

|        |                                      |                           |
|--------|--------------------------------------|---------------------------|
| CX1385 | TGAGGAGTTTGGCAATATCAG                | <i>FBP6</i> F3            |
| CX1386 | TGGTTGTAACGTGTGTAGCTG                | <i>FBP6</i> R3            |
| CX1387 | TGACTCACTGTTTCGTCCTACC               | <i>FBP6</i> F4            |
| CX1925 | TCCGAGCTCATCATTCTTAC                 | <i>ERG11</i> qRT-PCR F    |
| CX1926 | TGTTTCGTGGTCGCTTTTAC                 | <i>ERG11</i> qRT-PCR R    |
| CX1991 | TCCATCAGCAAATCCACAAG                 | <i>FBP3</i> F3            |
| CX1992 | TCTTTCATCGTCTGCCCTG                  | <i>FBP3</i> R3            |
| CX1993 | TGGAGTGGATTCGGTACAG                  | <i>FBP4</i> F3            |
| CX1994 | TGGTCCCTTTCACAATGTC                  | <i>FBP4</i> R3            |
| CX1995 | TCCTATCCTTGCTCATTTGG                 | <i>FBP9</i> F3            |
| CX1996 | TTCCACGACTTGTCTGTCTC                 | <i>FBP9</i> R3            |
| CX1997 | AGGACAGGCTGTTGAAACG                  | <i>FBP10</i> F3           |
| CX1998 | TATTGAACAATCCCCATCG                  | <i>FBP10</i> R3           |
| CX1999 | TCCCTATTATCAGCTCATCG                 | <i>FBP16</i> F3           |
| CX2000 | ATCCCATCTCTTACCCTCAG                 | <i>FBP16</i> R3           |
| CX2001 | AACTTCACCTGCCCATATG                  | <i>FBP18</i> F3           |
| CX2002 | TAAGCATCTCACCCCGATTG                 | <i>FBP18</i> R3           |
| CX2003 | TCTATCCCAAGCTACCATGC                 | <i>FBP5</i> F3            |
| CX2004 | AATTCCTGAACGGCAATCG                  | <i>FBP5</i> R3            |
| CX2005 | ATACTATCAACTTTCGGTGG                 | <i>FBP15</i> F3           |
| CX2006 | ACCAATTCTCTCATGAAACC                 | <i>FBP15</i> R3           |
| CX2007 | TACCCACCTCAAGGATATGG                 | <i>FBP20</i> F3           |
| CX2008 | TCGTTCATAGGTATCTTTCG                 | <i>FBP20</i> R3           |
| CX2009 | AGGACGAAGAAGGCATGAAG                 | <i>FBP8</i> F3            |
| CX2010 | ACATTGCGCTTAACTTGGTC                 | <i>FBP8</i> R3            |
| CX2061 | taccgagctcggatccTCCTGATGTCCAAACGATTG | <i>FBP4</i> complement F  |
| CX2062 | cggtactagtggatccTATGCCGTCCAGTTACACTC | <i>FBP4</i> complement R  |
| CX2063 | taccgagctcggatccTCTAGCAAGAACCACAGTCC | <i>FBP11</i> complement F |
| CX2064 | cggtactagtggatccTCTATCTGCTTATCTCTGCC | <i>FBP11</i> complement R |
| CX2065 | taccgagctcggatccTCAGTCCACACCAAACAGC  | <i>FBP8</i> complement F  |
| CX2066 | cggtactagtggatccAGCAAAGATTGACGATAATG | <i>FBP8</i> complement R  |

---
